# Supplementary material for: Fabrication of plasmonic arrays of nanodisks and nanotriangles by nanotip indentation lithography and their optical properties
Source: Royal Society of Chemistry journal article supplement (doi:10.1039/d0nr08398d), 2021-01-01
Supplement: d0nr08398d1.pdf [file d0nr08398d1.pdf]

# Supplementary Information for Fabrication of Plasmonic Arrays of Nanodisks and Nanotriangles by Nanotip Indentation Lithography and their Optical Properties

*Jongwoo Kim,<sup>1,†</sup> Jeong Seop Lee,<sup>2,†</sup> Ji-woong Kim,<sup>3</sup> Peter De Wolf,<sup>3</sup> Seunghyun Moon,<sup>4</sup> Dong Hwan Kim,<sup>5</sup>  
Joo-Hyun Song,<sup>6</sup> Jungwoo Kim,<sup>7</sup> Taewan Kim,<sup>8</sup> Sang Hwan Nam,<sup>1,7</sup> Yung Doug Suh,<sup>7,9</sup> Kyoung-Ho Kim,<sup>2,\*</sup>  
Hyunwoo Kim,<sup>7,\*</sup> and ChaeHo Shin<sup>5,\*</sup>*

<sup>1</sup> Center for Convergent Research of Emerging Virus Infection, Korea Research Institute of Chemical Technology, Daejeon 34114, South Korea

<sup>2</sup> Department of Physics, Chungbuk National University, Cheongju, Chungbuk 28644, South Korea

<sup>3</sup> Nano Surfaces and Metrology, 112, Robin Hill Road, CA, Santa Barbara, 93117, USA.

<sup>4</sup> Department of Aerospace and Mechanical Engineering, University of Notre Dame, Notre Dame, IN 46556, USA

<sup>5</sup> Interdisciplinary Materials Measurement Institute, Korea Research Institute of Standards and Science, Daejeon 34113, South Korea

<sup>6</sup> SME Partnership Group, Korea Research Institute of Standards and Science, Daejeon 34113, South Korea

<sup>7</sup> Laboratory for Advanced Molecular Probing (LAMP), Korea Research Institute of Chemical Technology, Daejeon 34114, South Korea

<sup>8</sup> Department of Electrical Engineering and Smart Grid Research Center, Jeonbuk National University, Jeonju, 54896, South Korea

<sup>9</sup> School of Chemical Engineering, Sungkyunkwan University, Suwon 16419, South Korea

\* E-mail: kyoungho@chungbuk.ac.kr (K.-H. Kim), chaeho.shin@kriss.re.kr (C. Shin), hwkim@kriict.re.kr (H. Kim)

† Jongwoo Kim and J. S. Lee contributed equally to this work.

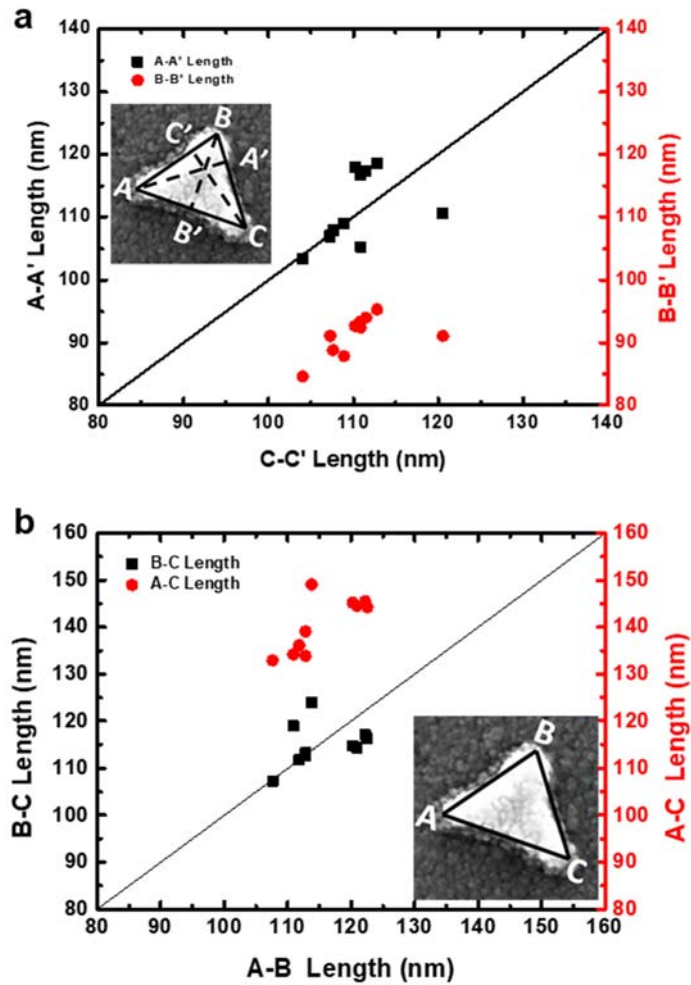

**Figure S1.** SEM analysis of the perpendicular line and edge lengths of the Au nanotriangle. a) Lengths of lines perpendicular to the baseline along A-A', B-B', and C-C' (inset, black dashed line) are measured and plotted as a function of the length of C-C'. Two lengths of A-A' and C-C' (black square) show a good agreement with the linear curve with a slope of one, indicating that  $A-A' = C-C'$ . The length B-B' (red circle) is approximately 20 nm shorter than the length C-C'. b) Lengths of the edge lines of the triangle along A-B, B-C, and A-C (inset, black line) are measured and plotted as a function of length A-B. Black line is an eye guide with a slope of one. Two lengths along A-B and B-C are similar ( $\sim 120$  nm), whereas the length along A-C is approximately 20 nm longer than the others.

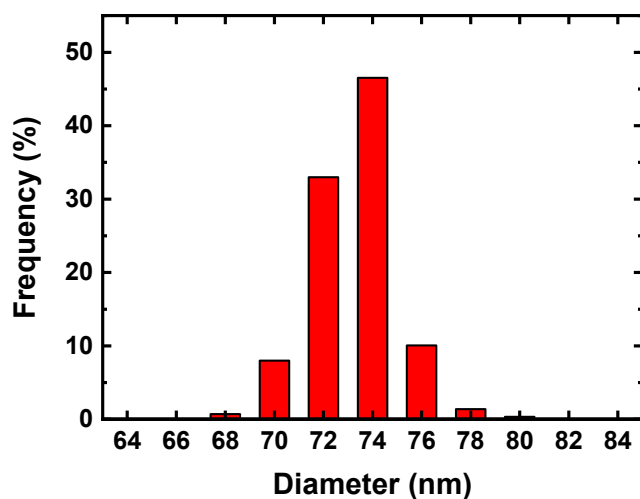

**Figure S2.** Histogram of diameter of Au nanodisks fabricated by NTIL using single AFM tip measured by scanning electron microscope (SEM).

**Table S1.** Statistics of the diameter of Au nanodisks fabricated by NTIL using single tip array by array

|                                  | Array 1<br>(180/900 NDs) | Array 2<br>(180/900 NDs) | Array 3<br>(180/900 NDs) | Array 4<br>(180/900 NDs) | Array 5<br>(180/900 NDs) | Array 6<br>(180/900 NDs) | Array 7<br>(180/900 NDs) | Array 8<br>(180/900 NDs) | Overall<br>(1440/7200 NDs) |
|----------------------------------|--------------------------|--------------------------|--------------------------|--------------------------|--------------------------|--------------------------|--------------------------|--------------------------|----------------------------|
| Average (nm)                     | 73.9                     | 74.6                     | 73.3                     | 73.4                     | 72.2                     | 73.4                     | 72.3                     | 73.4                     | 73.3                       |
| Standard deviation (nm)          | 2.2                      | 1.3                      | 1.1                      | 1.2                      | 1.2                      | 1.4                      | 1.6                      | 1.4                      | 1.6                        |
| Coefficient of variation (CV, %) | 3.0                      | 1.7                      | 1.5                      | 1.6                      | 1.6                      | 1.9                      | 2.2                      | 2.0                      | 2.2                        |
| Maximum (nm)                     | 79.0                     | 78.0                     | 75.7                     | 76.1                     | 72.3                     | 75.4                     | 75.1                     | 77.4                     | 79.0                       |
| Minimum (nm)                     | 68.3                     | 72.6                     | 71.0                     | 70.3                     | 70.0                     | 70.2                     | 69.6                     | 70.9                     | 68.3                       |

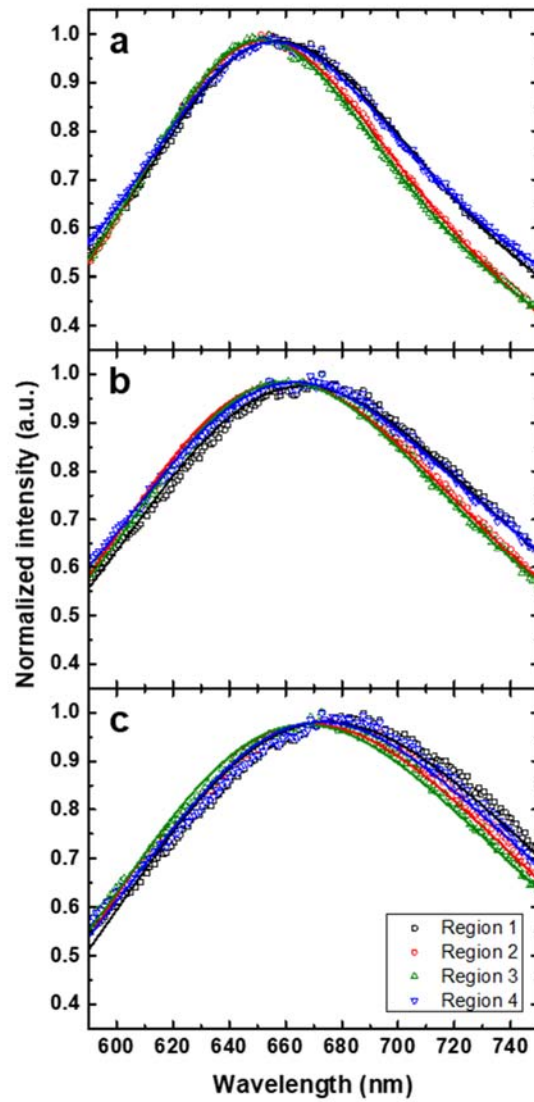

**Figure S3.** Spatial variation of LSPR spectra in a nanodisk array. a-c) Normalized LSPR spectra of the four regions of each gold nanodisk array fabricated with different indentation forces of 10.3 (a), 11.3 (b), and 12.4  $\mu\text{N}$  (c). The solid lines represent the Lorentzian fitted curves.

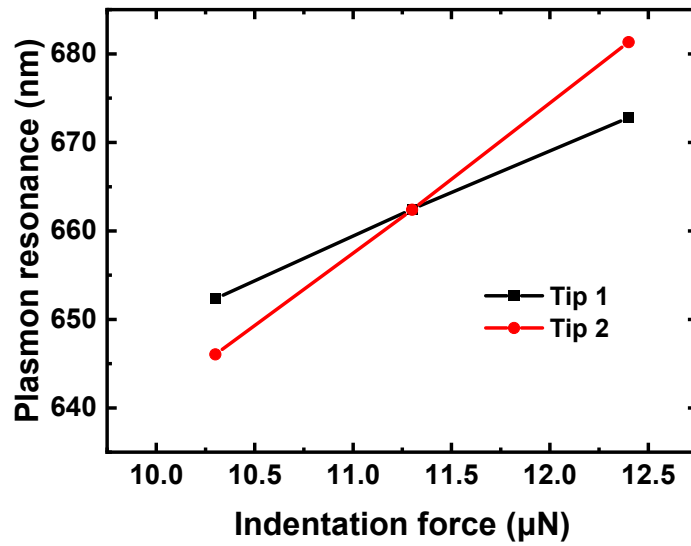

**Figure S4.** Localized surface plasmon resonance (LSPR) spectral peak positions of Au nanodisk arrays fabricated by NTIL as a function of indentation force. Two different AFM tips (AD-40-AS, Adama) were used for the patterning.

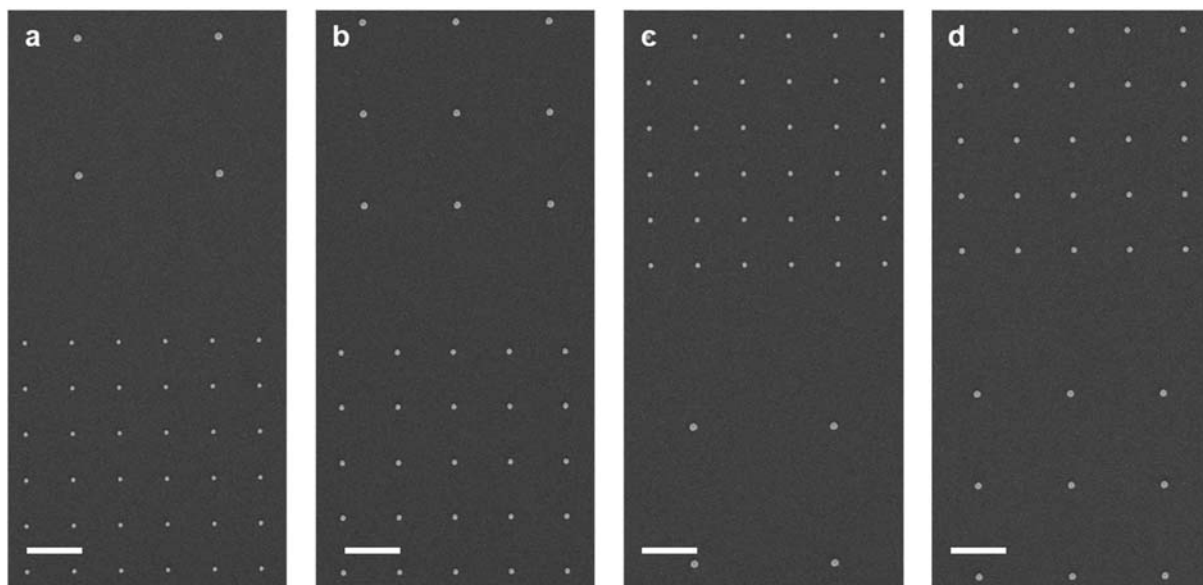

**Figure S5.** Scanning electron microscope (SEM) images of nanodisks arrays fabricated by NTIL with various array configurations. a-d) SEM images acquired from the selected areas of A to D in Figure 3d, respectively. Diameter sizes of nanodisks are 94 nm, 79 nm, 62 nm, and 54 nm for 2x2, 3x3, 5x5, and 6x6 array configurations, respectively. Scale bar is 2  $\mu\text{m}$ .

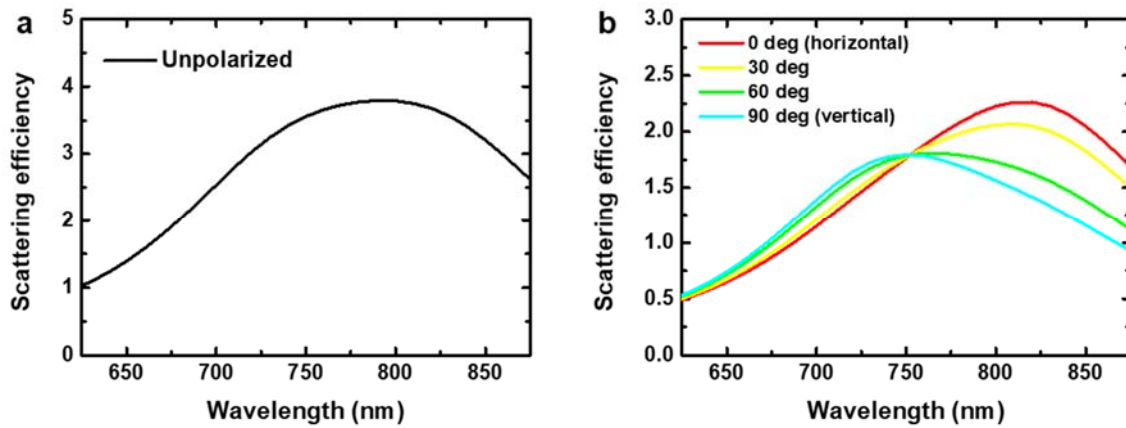

**Figure S6.** Calculated scattering efficiency spectra of a triangular nanostructure. a-b) Spectra with a ring-shaped unpolarized dark-field illumination (a) and with a ring-shaped polarized dark-field illumination (b). The length of the base and altitude of the triangular nanostructure were 160 and 110 nm, respectively. The incident angle was  $60^\circ$  with respect to the z-axis, and the incident plane was rotated around the center of the nanostructure with the step of  $10^\circ$ . With the rotation of the polarizer from  $0^\circ$  to  $90^\circ$  in b), the peak around 820 nm decreases, whereas the peak around 740 nm increases. This result shows good agreement with the experiments in Figure 4a.

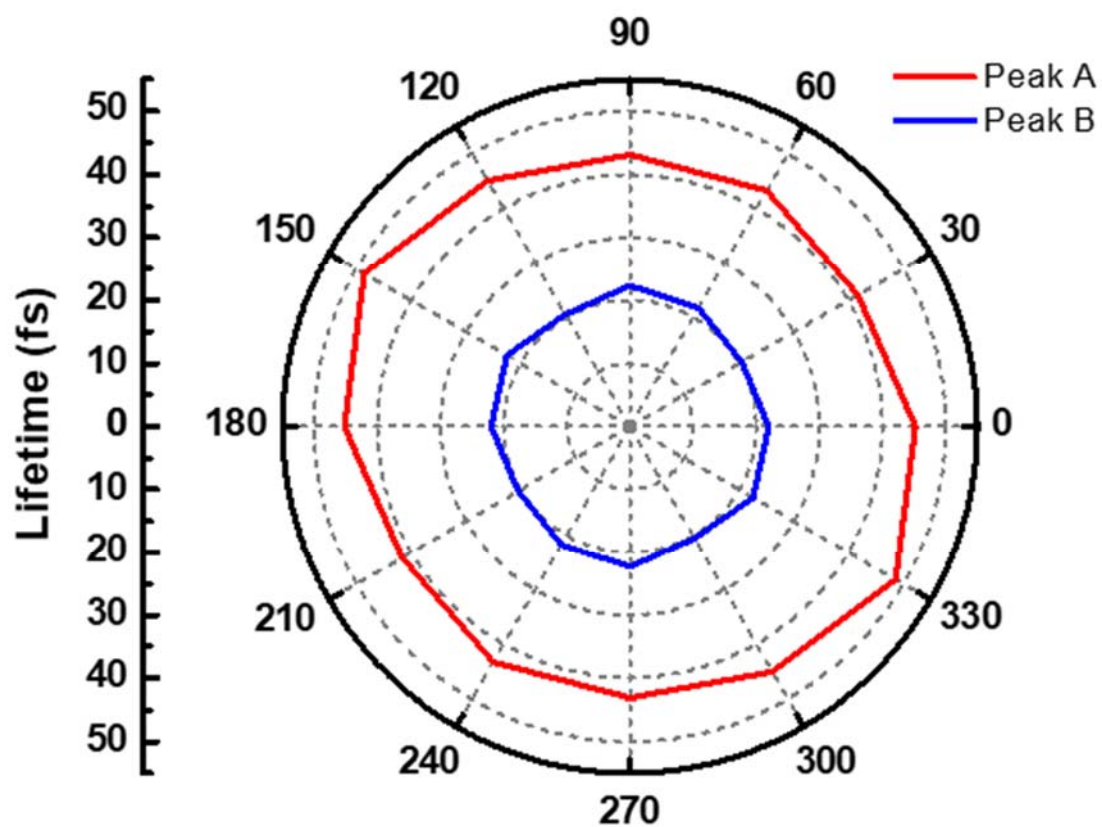

**Figure S7.** Polar plot of the LSPR lifetime in the Au nanotriangle dependent on the incident polarization. LSPR lifetime was extracted from the peak width in the dark-field optical scattering measurement. Spectral positions of Peak A and Peak B correspond to 820 and 730 nm, respectively, as shown in Figure 4a.



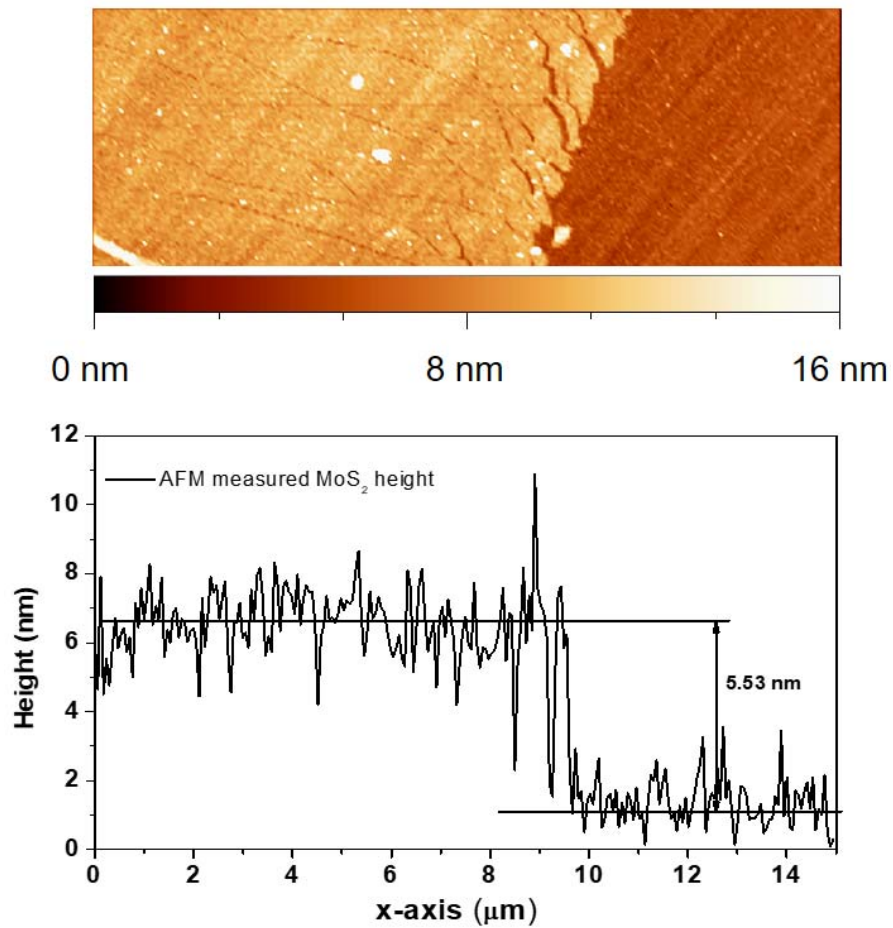

**Figure S8.** AFM thickness measurement of a few-layer MoS<sub>2</sub> film transferred onto the substrate with NTIL-fabricated nanostructures. (top) AFM morphology of the MoS<sub>2</sub> film. The scan range was 15 x 5 μm. The color bar indicating the measured thickness is shown below. (bottom) Cross-section profile of the AFM morphology along the x-axis.

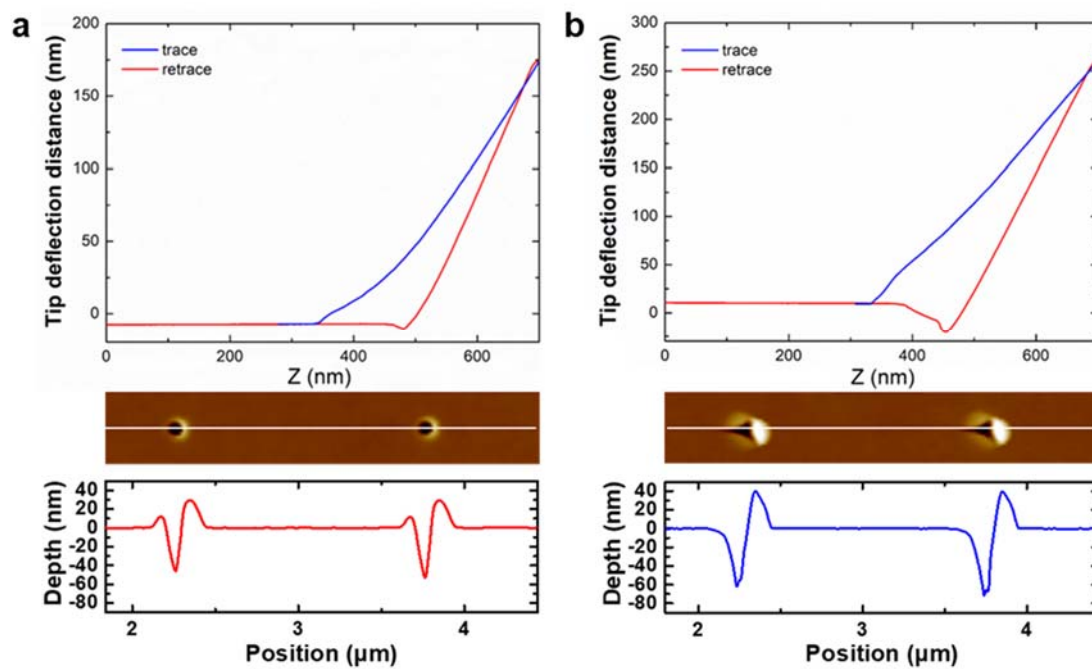

**Figure S9.** Force–distance curve, indented AFM image, and its cross-section profile. a) Circular shape in a mask layer with a force of approximately  $7.2 \mu\text{N}$  (tip deflection distance 180 nm, spring constant  $40 \text{ N m}^{-1}$ , AD-40-AS). b) Triangular shape in a mask layer with a force of approximately  $10.5 \mu\text{N}$  (tip deflection distance 250 nm, spring constant  $42 \text{ N m}^{-1}$ , PPP-NCHR).

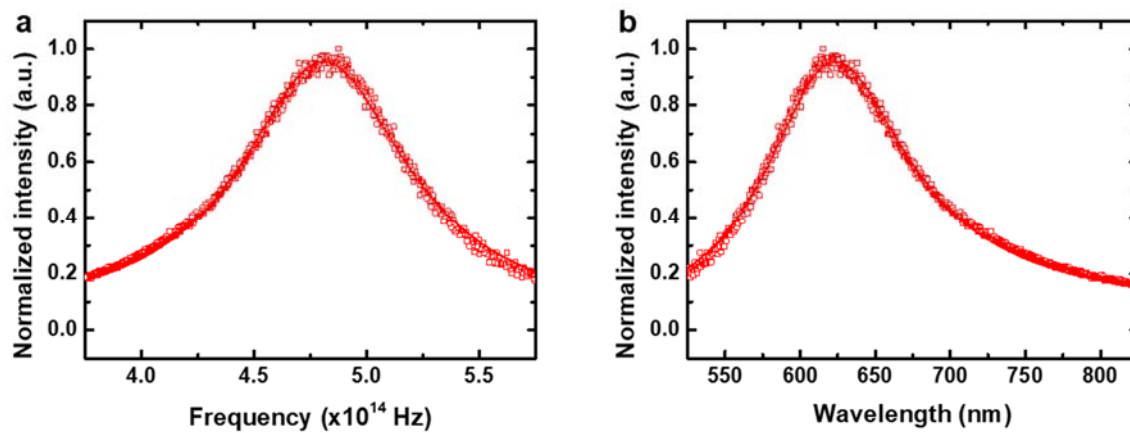

**Figure S10.** Representative optical scattering spectra of a gold nanodisk array. a-b) The spectra of the frequency domain (a) and its corresponding wavelength domain (b). The solid lines represent the Lorentzian fitted curves in the frequency domain.
